# Supplementary material for: Identifying the Sources of Intestinal Colonization With Extended-Spectrum β-Lactamase-Producing Escherichia coli in Healthy Infants in the Community
Source: Front Microbiol. 2022 Mar 31;13:803043. doi: 10.3389/fmicb.2022.803043 (PMC9008759; doi:10.3389/fmicb.2022.803043)
Supplement: Supplementary file 1 [file Table_1.XLS]

## Sheet: Table S1
Supplementary Table 1: Demographic information
Household (HH) ID	Sample ID	Sample Typea	Location	Method of Childbirthb	Child Age (month)	Feeding practices	Child Antibiotic consumption within 3 months	Reason for antibiotic consumption
HH-1	RH-001-MS	MS	Hajiganj	CS	4	Breast milk and complementary food	Yes	Itching all over the body
	RH-001-CS	CS
	RH-001-WU	WU
HH-2	RH-002-MS	MS	Hajiganj	CS	11	Breast milk and complementary food	Yes	Diarrhoea
	RH-002-CS	CS
	RH-002-WU	WU
HH-3	RH-003-MS	MS	Hajiganj	CS	10	Breast milk and complementary food	Yes	Fever
	RH-003-CS	CS
	RH-003-WU	WU
HH-4	RH-004-MS	MS	Hajiganj	NVD	11	Breast milk and complementary food	No
	RH-004-CS	CS
	RH-004-WU	WU
HH-5	RH-008-MS	MS	Hajiganj	NVD	8	Breast milk and complementary food	No
	RH-008-CS	CS
	RH-008-WU	WU
HH-6	RH-009-MS	MS	Hajiganj	Unknown	8	Breast milk and complementary food	Yes	Fever
	RH-009-CS	CS
	RH-009-WU	WU
HH-7	RH-017-MS	MS	Hajiganj	Unknown	5	Breast milk and complementary food	No
	RH-017-CS	CS
	RH-017-WU	WU
HH-8	RH-018-MS	MS	Hajiganj	CS	7	Breast milk and complementary food	Yes	Fever and cold
	RH-018-CS	CS
	RH-018-WU	WU
HH-9	RH-020-MS	MS	Hajiganj	CS	1	Breast milk only	No
	RH-020-CS	CS
	RH-020-WU	WU
HH-10	RH-022-MS	MS	Hajiganj	CS	6	Breast milk and complementary food	No
	RH-022-CS	CS
	RH-022-WU	WU
HH-11	RH-023-MS	MS	Hajiganj	NVD	4	Breast milk and complementary food	No
	RH-023-CS	CS
	RH-023-WU	WU
HH-12	RH-024-MS	MS	Hajiganj	CS	10	Breast milk and complementary food	No
	RH-024-CS	CS
	RH-024-WU	WU
HH-13	RH-025-MS	MS	Hajiganj	NVD	5	Breast milk and complementary food	Yes	Fever, cold and cough
	RH-025-CS	CS
	RH-025-WU	WU
HH-14	RH-026-MS	MS	Hajiganj	CS	5	Breast milk and complementary food	Yes	Fever
	RH-026-CS	CS
	RH-026-WU	WU
HH-15	RH-028-MS	MS	Hajiganj	NVD	9	Breast milk and complementary food	Yes	Fever, cold and cough
	RH-028-CS	CS
	RH-028-WU	WU
HH-16	RH-029-MS	MS	Hajiganj	CS	9	Breast milk and complementary food	No
	RH-029-CS	CS
	RH-029-WU	WU
HH-17	RH-030-MS	MS	Hajiganj	CS	11	Breast milk and complementary food	Yes	Fever, cold and cough
	RH-030-CS	CS
	RH-030-WU	WU
HH-18	RH-031-MS	MS	Hajiganj	CS	6	Breast milk and complementary food	Yes	Fever
	RH-031-CS	CS
	RH-031-WU	WU
HH-19	RH-032-MS	MS	Hajiganj	NVD	10	Breast milk and complementary food	Yes	Fever, vomitting and diarrhoea
	RH-032-CS	CS
	RH-032-WU	WU
HH-20	RH-033-MS	MS	Hajiganj	CS	6	Breast milk and complementary food	No
	RH-033-CS	CS
	RH-033-WU	WU
HH-21	RH-034-MS	MS	Hajiganj	NVD	7	Breast milk and complementary food	Yes	Fever and cold
	RH-034-CS	CS
	RH-034-WU	WU
HH-22	RH-040-MS	MS	Hajiganj	Unknown	10	Breast milk and complementary food	Yes	Fever, cold and cough
	RH-040-CS	CS
	RH-040-WU	WU
HH-23	RH-041-MS	MS	Hajiganj	Unknown	4	Breast milk and complementary food	Yes	Fever
	RH-041-CS	CS
	RH-041-WU	WU
HH-24	RH-042-MS	MS	Hajiganj	CS	3	Breast milk and complementary food	Yes	Fever and diarrhoea
	RH-042-CS	CS
	RH-042-WU	WU
HH-25	RH-044-MS	MS	Hajiganj	CS	4	Breast milk and complementary food	Yes	Fever and cold
	RH-044-CS	CS
	RH-044-WU	WU
HH-26	RH-045-MS	MS	Hajiganj	NVD	5	Breast milk and complementary food	Yes	Fever and diarrhoea
	RH-045-CS	CS
	RH-045-WU	WU
HH-27	RH-047-MS	MS	Hajiganj	Unknown	6	Breast milk and complementary food	Yes	Fever, cold and cough
	RH-047-CS	CS
	RH-047-WU	WU
HH-28	RH-048-MS	MS	Hajiganj	CS	10	Breast milk and complementary food	Yes	Mouth sore
	RH-048-CS	CS
	RH-048-WU	WU
HH-29	RM-052-MS	MS	Matlab	Unknown	5	Breast milk and complementary food	No	Fever, cold and cough
	RM-052-CS	CS
	RM-052-WU	WU
HH-30	RM-054-MS	MS	Matlab	CS	4	Breast milk and complementary food	Yes	Fever
	RM-054-CS	CS
	RM-054-WU	WU
HH-31	RM-055-MS	MS	Matlab	CS	7	Breast milk and complementary food	Yes	Fever
	RM-055-CS	CS
	RM-055-WU	WU
HH-32	RM-056-MS	MS	Matlab	Unknown	11	Breast milk and complementary food	Yes	Fever
	RM-056-CS	CS
	RM-056-WU	WU
HH-33	RM-063-MS	MS	Matlab	CS	7	Breast milk and complementary food	Yes	Fever, cough and watery stool
	RM-063-CS	CS
	RM-063-WU	WU
HH-34	RM-064-MS	MS	Matlab	NVD	6	Breast milk and complementary food	Yes	Fever
	RM-064-CS	CS
	RM-064-WU	WU
HH-35	RM-065-MS	MS	Matlab	NVD	12	Breast milk and complementary food	No
	RM-065-CS	CS
	RM-065-WU	WU
HH-36	RM-069-MS	MS	Matlab	CS	6	Breast milk and complementary food	No
	RM-069-CS	CS
	RM-069-WU	WU
HH-37	RM-071-MS	MS	Matlab	NVD	12	Breast milk and complementary food	Yes	Itching all over the body
	RM-071-CS	CS
	RM-071-WU	WU
HH-38	RM-080-MS	MS	Matlab	NVD	7	Breast milk and complementary food	No
	RM-080-CS	CS
	RM-080-WU	WU
HH-39	RM-087-MS	MS	Matlab	CS	6	Breast milk and complementary food	Yes	Fever, cold and cough
	RM-087-CS	CS
	RM-087-WU	WU
HH-40	RM-089-MS	MS	Matlab	Unknown	8	Breast milk and complementary food	Yes	Fever and itching
	RM-089-CS	CS
	RM-089-WU	WU
HH-41	RM-090-MS	MS	Matlab	NVD	4	Breast milk and complementary food	No
	RM-090-CS	CS
	RM-090-WU	WU
HH-42	RM-093-MS	MS	Matlab	NVD	7	Breast milk and complementary food	Yes	Fever and cough
	RM-093-CS	CS
	RM-093-WU	WU
HH-43	RM-094-MS	MS	Matlab	Unknown	5	Breast milk and complementary food	Yes	Cough
	RM-094-CS	CS
	RM-094-WU	WU
HH-44	RM-096-MS	MS	Matlab	NVD	9	Breast milk and complementary food	No
	RM-096-CS	CS
	RM-096-WU	WU
HH-45	RM-097-MS	MS	Matlab	CS	7	Breast milk and complementary food	Yes	Fever
	RM-097-CS	CS
	RM-097-WU	WU
HH-46	RM-103-MS	MS	Matlab	NVD	12	Breast milk and complementary food	No
	RM-103-CS	CS
	RM-103-WU	WU
aMS, mother stool; CS, child stool; WU, drinking water at point-of-use
bCS, C-section; NVD, normal vaginal delivery;
